# Supplementary material for: Association and Interaction Effects of Interleukin-12 Related Genes and Physical Activity on Cognitive Aging in Old Adults in the Taiwanese Population
Source: PubMed Central journal article supplement (PMC6795278; doi:10.3389/fneur.2019.01065), 2019-10-09
Supplement: Data_Sheet_1.pdf [file Data_Sheet_1.pdf]

Supplementary information for

Association and interaction effects of interleukin-12 related genes and  
physical activity on cognitive aging in old adults in the Taiwanese  
population

Eugene Lin<sup>1,2,3\*</sup>, Po-Hsiu Kuo<sup>4</sup>, Yu-Li Liu<sup>5</sup>, Albert C. Yang<sup>6,7</sup>,  
Shih-Jen Tsai<sup>8,9\*</sup>

<sup>1</sup> Department of Biostatistics, University of Washington, Seattle, WA 98195, USA

<sup>2</sup> Department of Electrical & Computer Engineering, University of Washington, Seattle,  
WA 98195, USA

<sup>3</sup> Graduate Institute of Biomedical Sciences, China Medical University, Taichung, Taiwan

<sup>4</sup> Department of Public Health, Institute of Epidemiology and Preventive Medicine,  
National Taiwan University, Taipei, Taiwan

<sup>5</sup> Center for Neuropsychiatric Research, National Health Research Institutes, Miaoli  
County, Taiwan

<sup>6</sup> Division of Interdisciplinary Medicine and Biotechnology, Beth Israel Deaconess  
Medical Center/Harvard Medical School, Boston, MA 02215, USA

<sup>7</sup> Institute of Brain Science, National Yang-Ming University, Taipei, Taiwan

<sup>8</sup> Department of Psychiatry, Taipei Veterans General Hospital, Taipei, Taiwan

<sup>9</sup> Division of Psychiatry, National Yang-Ming University, Taipei, Taiwan

**Supplementary Table 1.** Genotyping results for 75 SNPs in four interleukin-12 related genes including the *IL12A*, *IL12B*, *IL12RB1*, and *IL12RB2* genes.

| Gene         | CHR | SNP         | A1 | A2 | MAF   | Genotyping call rate | P (HWE)      |
|--------------|-----|-------------|----|----|-------|----------------------|--------------|
| <i>IL12A</i> | 3   | rs11919494  | T  | C  | 0.096 | 0.998                | 0.419        |
|              |     | rs67717498  | C  | T  | 0.093 | 0.999                | 0.694        |
|              |     | rs12635350  | A  | G  | 0.192 | 0.999                | 0.631        |
|              |     | rs9864047   | C  | G  | 0.253 | 0.998                | 0.109        |
|              |     | rs72494860  | G  | A  | 0.151 | <b>0.720</b>         | 0.614        |
|              |     | rs12631488  | G  | A  | 0.149 | <b>0.272</b>         | 0.540        |
|              |     | rs7649651   | A  | C  | 0.398 | 0.999                | 0.743        |
|              |     | rs6441301   | G  | T  | 0.314 | 0.999                | 0.672        |
|              |     | rs6762955   | A  | T  | 0.057 | 0.998                | 0.646        |
|              |     | rs77444103  | T  | C  | 0.122 | 0.999                | 0.757        |
|              |     | rs9840016   | C  | T  | 0.274 | 0.997                | 0.182        |
|              |     | rs73154514  | G  | A  | 0.187 | 0.999                | 0.114        |
|              |     | rs11918072  | C  | T  | 0.174 | 0.999                | 0.236        |
|              |     | rs116910715 | A  | G  | 0.065 | 0.999                | 0.376        |
|              |     | rs6795437   | C  | T  | 0.203 | 0.999                | 0.201        |
|              |     | rs78902931  | G  | A  | 0.128 | 0.997                | 0.111        |
|              |     | rs7631387   | G  | A  | 0.177 | 0.999                | 0.171        |
|              |     | rs480350    | G  | A  | 0.226 | 0.999                | 0.477        |
|              |     | rs117988966 | A  | G  | 0.042 | 0.999                | 0.253        |
|              |     | rs1498736   | A  | T  | 0.191 | 0.999                | 0.707        |
|              |     | rs564799    | T  | C  | 0.167 | 0.999                | <b>0.046</b> |
|              |     | rs485789    | T  | G  | 0.166 | 0.998                | 0.052        |
|              |     | rs79458760  | A  | C  | 0.092 | 0.999                | 0.195        |
|              |     | rs67872958  | C  | T  | 0.192 | 0.999                | 0.612        |
|              |     | rs9880646   | G  | A  | 0.449 | 0.999                | 0.155        |
|              |     | rs74906756  | T  | C  | 0.097 | 0.998                | 0.476        |
|              |     | rs78569420  | T  | G  | 0.083 | 0.999                | 0.585        |

|                |    |            |   |   |       |       |              |
|----------------|----|------------|---|---|-------|-------|--------------|
|                |    | rs4130283  | G | A | 0.265 | 0.998 | <b>0.030</b> |
|                |    | rs9853972  | C | T | 0.361 | 0.999 | <b>0.017</b> |
| <i>IL12B</i>   | 5  | rs3212227  | G | T | 0.442 | 0.996 | 0.866        |
|                |    | rs2853697  | G | T | 0.177 | 0.999 | 0.550        |
|                |    | rs2421047  | A | G | 0.441 | 0.998 | 0.749        |
|                |    | rs3213097  | T | A | 0.441 | 1.000 | 0.814        |
|                |    | rs3213094  | T | C | 0.455 | 0.997 | 0.515        |
|                |    | rs2569254  | T | C | 0.173 | 0.999 | 0.685        |
|                |    | rs3181218  | T | C | 0.455 | 0.997 | 0.482        |
|                |    | rs3181216  | T | A | 0.328 | 0.997 | 0.128        |
|                |    | rs3212220  | A | C | 0.455 | 0.998 | 0.462        |
|                |    | rs3212219  | A | C | 0.456 | 0.997 | 0.493        |
|                |    | rs3212217  | G | C | 0.456 | 1.000 | 0.582        |
|                |    | rs1003199  | T | C | 0.388 | 0.999 | 0.889        |
|                |    | rs2546893  | G | A | 0.492 | 0.999 | 0.895        |
|                |    | rs730690   | A | G | 0.440 | 0.998 | 0.545        |
|                |    | rs730691   | T | C | 0.440 | 0.995 | 0.195        |
|                |    | rs6894567  | G | A | 0.450 | 0.998 | 0.262        |
| <i>IL12RB1</i> | 19 | rs445521   | G | T | 0.356 | 1.000 | 0.108        |
|                |    | rs383483   | G | A | 0.381 | 0.999 | 0.225        |
|                |    | rs372889   | C | T | 0.380 | 0.998 | 0.268        |
|                |    | rs3761041  | T | C | 0.309 | 1.000 | 0.095        |
|                |    | rs429774   | C | T | 0.361 | 0.999 | 0.156        |
|                |    | rs376008   | T | C | 0.358 | 0.999 | 0.087        |
|                |    | rs7250425  | C | T | 0.192 | 0.998 | 0.200        |
| <i>IL12RB2</i> | 1  | rs7544381  | T | C | 0.173 | 0.999 | 0.794        |
|                |    | rs3790558  | G | T | 0.468 | 0.998 | 0.125        |
|                |    | rs2066445  | T | C | 0.225 | 0.998 | 0.122        |
|                |    | rs4655538  | T | C | 0.186 | 0.997 | 0.661        |
|                |    | rs2201584  | A | G | 0.324 | 0.998 | 0.955        |
|                |    | rs1495964  | A | G | 0.402 | 0.999 | 0.743        |
|                |    | rs17129794 | C | A | 0.058 | 0.999 | 0.324        |
|                |    | rs6693065  | A | G | 0.403 | 0.998 | 0.667        |

|  |  |             |   |   |       |              |              |
|--|--|-------------|---|---|-------|--------------|--------------|
|  |  | rs4655699   | T | C | 0.346 | 0.996        | 0.463        |
|  |  | rs3790566   | T | C | 0.264 | 0.998        | 0.865        |
|  |  | rs3790567   | A | G | 0.256 | <b>0.885</b> | <b>0.006</b> |
|  |  | rs114967702 | G | A | 0.193 | 0.997        | 0.324        |
|  |  | rs3790569   | C | T | 0.389 | 0.999        | 0.972        |
|  |  | rs3828069   | C | T | 0.394 | 0.999        | 0.795        |
|  |  | rs881086    | T | A | 0.342 | 0.996        | 0.543        |
|  |  | rs79411372  | T | C | 0.073 | 1.000        | 0.903        |
|  |  | rs2228420   | A | G | 0.344 | <b>0.228</b> | 1.000        |
|  |  | rs2270614   | G | A | 0.341 | 0.999        | 0.645        |
|  |  | rs12133473  | A | G | 0.396 | <b>0.228</b> | 0.789        |
|  |  | rs6699474   | A | G | 0.397 | 0.999        | 0.890        |
|  |  | rs75699623  | A | G | 0.069 | 0.998        | 0.561        |
|  |  | rs2229546   | A | C | 0.375 | <b>0.807</b> | 0.313        |
|  |  | rs1874396   | G | T | 0.227 | 0.997        | 0.944        |

A1 = minor allele, A2 = major allele, Chr = chromosome, HWE = Hardy–Weinberg equilibrium, MAF = minor allele frequency, MMSE = Mini-Mental State Examination.

P values of < 0.05 are shown in bold.

Genotyping call rate values of < 0.95 are shown in bold.

**Supplementary Table 2.** Linear regression models of associations between the MMSE

scores and 35 tag SNPs in four interleukin-12 related genes including the *IL12A*, *IL12B*,

*IL12RB1*, and *IL12RB2* genes.

| Gene           | CHR | SNP         | A1     | A2            | P<br>(dominant)             | P<br>(recessive) |
|----------------|-----|-------------|--------|---------------|-----------------------------|------------------|
| <i>IL12A</i>   | 3   | rs67717498  | C      | T             | 0.2749                      | 0.7116           |
|                |     | rs9864047   | C      | G             | 0.3081                      | 0.3083           |
|                |     | rs6762955   | A      | T             | 0.6204                      | 0.8960           |
|                |     | rs77444103  | T      | C             | 0.5089                      | 0.7454           |
|                |     | rs9840016   | C      | T             | 0.9975                      | 0.4018           |
|                |     | rs116910715 | A      | G             | 0.3012                      | <b>0.0031</b>    |
|                |     | rs6795437   | C      | T             | 0.9019                      | 0.0731           |
|                |     | rs78902931  | G      | A             | 0.7782                      | <b>0.0388</b>    |
|                |     | rs7631387   | G      | A             | 0.1475                      | 0.6133           |
|                |     | rs480350    | G      | A             | 0.3322                      | 0.8794           |
|                |     | rs117988966 | A      | G             | 0.4264                      | 0.1254           |
|                |     | rs485789    | T      | G             | 0.1641                      | 0.9835           |
|                |     | rs79458760  | A      | C             | 0.3532                      | 0.9987           |
|                |     | rs67872958  | C      | T             | 0.7945                      | 0.4643           |
|                |     | rs9880646   | G      | A             | 0.4764                      | 0.9838           |
| rs78569420     | T   | G           | 0.6042 | <b>0.0093</b> |                             |                  |
| <i>IL12B</i>   | 5   | rs2853697   | G      | T             | 0.2960                      | 0.3023           |
|                |     | rs3181216   | T      | A             | 0.7893                      | 0.7807           |
|                |     | rs1003199   | T      | C             | 0.7502                      | 0.0701           |
|                |     | rs730691    | T      | C             | <b>0.0472</b>               | 0.8141           |
| <i>IL12RB1</i> | 19  | rs445521    | G      | T             | 0.5320                      | 0.7688           |
|                |     | rs383483    | G      | A             | 0.4138                      | 0.4997           |
|                |     | rs7250425   | C      | T             | 0.2391                      | 0.7719           |
| <i>IL12RB2</i> | 1   | rs7544381   | T      | C             | 0.3812                      | 0.1670           |
|                |     | rs3790558   | G      | T             | <b>6.87x10<sup>-4</sup></b> | 0.1186           |

|             |   |   |               |        |
|-------------|---|---|---------------|--------|
| rs4655538   | T | C | <b>0.0454</b> | 0.9679 |
| rs2201584   | A | G | 0.7924        | 0.0883 |
| rs1495964   | A | G | 0.1820        | 0.3211 |
| rs17129794  | C | A | 0.9010        | 0.2963 |
| rs6693065   | A | G | 0.1662        | 0.6538 |
| rs114967702 | G | A | 0.5421        | 0.5514 |
| rs3790569   | C | T | 0.3377        | 0.4489 |
| rs79411372  | T | C | 0.4203        | 0.2196 |
| rs75699623  | A | G | <b>0.0308</b> | 0.8652 |
| rs1874396   | G | T | <b>0.0425</b> | 0.9891 |

A1 = minor allele, A2 = major allele, Chr = chromosome, MMSE = Mini-Mental State

Examination.

P values of < 0.05 are shown in bold.

Analysis was obtained after adjustment for covariates including age, gender, and education.

**Supplementary Table 3.** Linear regression models of associations between the MMSE scores and 2 SNPs within the *IL12A* and *IL12B* genes.

| Gene         | CHR | SNP       | A1 | A2 | MAF   | Dominant model |      |        | Recessive model |      |        |
|--------------|-----|-----------|----|----|-------|----------------|------|--------|-----------------|------|--------|
|              |     |           |    |    |       | BETA           | SE   | P      | BETA            | SE   | P      |
| <i>IL12A</i> | 3   | rs568408  | A  | G  | 0.117 | 0.15           | 0.11 | 0.1625 | -0.07           | 0.42 | 0.8669 |
| <i>IL12B</i> | 5   | rs3212227 | A  | C  | 0.442 | -0.13          | 0.09 | 0.1800 | -0.10           | 0.11 | 0.3621 |

A1 = minor allele, A2 = major allele, BETA = Beta coefficients, Chr = chromosome, HWE = Hardy–Weinberg equilibrium,

MAF = minor allele frequency, MMSE = Mini-Mental State Examination, SE = standard error.

Analysis was obtained after adjustment for covariates including age, gender, and education.

**Supplementary Table S4.** MAF in various ethnic populations for 8 SNPs identified in our study.

| Gene           | CHR | SNP         | A1 | A2 | MAF                    |                       |                         |                                |                          |
|----------------|-----|-------------|----|----|------------------------|-----------------------|-------------------------|--------------------------------|--------------------------|
|                |     |             |    |    | Taiwanese <sup>a</sup> | European <sup>b</sup> | East Asian <sup>b</sup> | African Americans <sup>b</sup> | South Asian <sup>b</sup> |
| <i>IL12A</i>   | 3   | rs116910715 | A  | G  | 0.065                  | 0.000                 | 0.057                   | 0.000                          | 0.000                    |
|                |     | rs78902931  | G  | A  | 0.128                  | 0.001                 | 0.126                   | 0.000                          | 0.01                     |
|                |     | rs78569420  | T  | G  | 0.083                  | 0.000                 | 0.103                   | 0.000                          | 0.000                    |
| <i>IL12B</i>   | 5   | rs730691    | T  | C  | 0.440                  | 0.377                 | 0.504                   | 0.654                          | 0.47                     |
| <i>IL12RB2</i> | 1   | rs3790558   | G  | T  | 0.468                  | 0.437                 | 0.473                   | 0.865                          | 0.48                     |
|                |     | rs4655538   | T  | C  | 0.186                  | 0.023                 | 0.163                   | 0.269                          | 0.09                     |
|                |     | rs75699623  | A  | G  | 0.069                  | 0.000                 | 0.068                   | 0.000                          | 0.000                    |
|                |     | rs1874396   | G  | T  | 0.227                  | 0.025                 | 0.200                   | 0.318                          | 0.09                     |

A1 = minor allele, A2 = major allele, Chr = chromosome, MAF = minor allele frequency.

<sup>a</sup>Data from the present study.

<sup>b</sup>Data from the 1000 Genomes Project (<https://www.ncbi.nlm.nih.gov/snp/>).
